# Supplementary material
Source: publisher site journal article supplement (https://www.spandidos-publications.com/1292/downloadSupplementary)
Supplement: Supplementary file 1 [file downloadSupplementary]

## Sheet: Gene Table
Table SI. RT2_Profiler_PCR_Array_Data_Analysis.
PCR Array Catalog #:		LAHS-002Z
Position	Unigene	Refseq	Symbol	Description	Gname	RT2 Catalog
A01	Hs.713690	ENST00000437930	ACTA2-AS1	ACTA2 antisense RNA 1	ZXF1/uc001kfo.1	LPH01498A
A02	Hs.660881	ENST00000460833	ADAMTS9-AS2	ADAMTS9 antisense RNA 2	-	LPH14614A
A03	Hs.663029	ENST00000608442	AFAP1-AS1	AFAP1 antisense RNA 1	AFAP1-AS/AFAP1AS	LPH27887A
A04	Hs.742166	ENST00000601203	AIRN	Antisense of IGF2R non-protein coding RNA	AIR/IGF2R-AS/IGF2R-AS1/IGF2RAS/NCRNA00088	LPH25972A
A05	Hs.49768	NR_047671	BANCR	BRAF-activated non-protein coding RNA	LINC00586	LPH00180A
A06	Hs.24611	NR_024049	BCAR4	Breast cancer anti-estrogen resistance 4	-	LPH23807A
A07	Hs.666219	NR_103783	BLACAT1	Bladder cancer associated transcript 1 (non-protein coding)	LINC00912/linc-UBC1/onco-lncRNA-30	LPH00202A
A08	Hs.644159	ENST00000604200	CAHM	Colon adenocarcinoma hypermethylated (non-protein coding)	LINC00468	LPH26715A
A09	Hs.651214	ENST00000413862	CBR3-AS1	CBR3 antisense RNA 1	PlncRNA-1/PlncRNA1	LPH12691A
A10	Hs.343864	ENST00000500112	CCAT1	Colon cancer associated transcript 1 (non-protein coding)	CARLo-5/onco-lncRNA-40	LPH15969A
A11	Hs.745578	NR_109834	CCAT2	Colon cancer associated transcript 2 (non-protein coding)	LINC00873/NCCP1	LPH28461A
A12	Hs.512599	ENST00000421632	CDKN2B-AS1	CDKN2B antisense RNA 1	ANRIL/CDKN2B-AS/CDKN2BAS/NCRNA00089/PCAT12/p15AS	LPH14168A
B01	Hs.237396	ENST00000501177	CRNDE	Colorectal neoplasia differentially expressed	CRNDEP/LINC00180/NCRNA00180/PNAS-108/lincIRX5	LPH15823A
B02	Hs.646438	NR_002733	DGCR5	DiGeorge syndrome critical region gene 5 (non-protein coding)	LINC00037/NCRNA00037	LPH13149A
B03	Hs.547964	NR_002612	DLEU2	Deleted in lymphocytic leukemia 2 (non-protein coding)	1B4/BCMSUN/DLB2/LEU2/LINC00022/MIR15AHG/NCRNA00022/RFP2OS/TRIM13OS	LPH09300A
B04	Hs.34969	NR_015448	DLX6-AS1	DLX6 antisense RNA 1	DLX6-AS/DLX6AS/Evf-2/NCRNA00212	LPH09398A
B05	Hs.312592	NR_002791	EMX2OS	EMX2 opposite strand (non-protein coding)	EMX2-AS1/NCRNA00045	LPH08128A
B06	Hs.349570	ENST00000418855	FTX	FTX transcript, XIST regulator (non-protein coding)	LINC00182/MIR374AHG/NCRNA00182	LPH08634A
B07	N/A	ENST00000419650	GACAT1	Gastric cancer associated transcript 1 (non-protein coding) [Source:HGNC Symbol;Acc:48336]	GACAT1	LPH10199A
B08	Hs.531856	NR_002578	GAS5	Growth arrest-specific 5 (non-protein coding)	NCRNA00030/SNHG2	LPH11340A
B09	Hs.369201	NR_044995	GAS6-AS1	GAS6 antisense RNA 1	-	LPH10662A
B10	Hs.122718	NR_002785	GNAS-AS1	GNAS antisense RNA 1	GNAS-AS/GNAS1AS/GNASAS/NCRNA00075/NESP-AS/NESPAS/SANG	LPH11888A
B11	Hs.533566	NR_002196	H19	H19, imprinted maternally expressed transcript (non-protein coding)	ASM/ASM1/BWS/D11S813E/LINC00008/NCRNA00008/WT2	LPH01147A
B12	Hs.61435	NR_003679	HAND2-AS1	Nbla00301	DEIN/NBLA00301	LPH12882A
C01	Hs.655606	NR_045680	HEIH	Hepatocellular carcinoma up-regulated EZH2-associated long non-coding RNA	HCCAT2/LINC-HEIH/LINC00848/lncRNA-HEIH	LPH00174A
C02	N/A	ENST00000557544	HIF1A-AS1	HIF1A antisense RNA 1 [Source:HGNC Symbol;Acc:43014]	HIF1A-AS1	LPH21513A
C03	N/A	NR_045406	HIF1A-AS2	HIF1A antisense RNA 2	HIF1A-AS2	LPH00171A
C04	Hs.612351	ENST00000433033	HNF1A-AS1	HNF1A antisense RNA 1 (non-protein coding)	C12orf27/NCRNA00262	LPH28470A
C05	Hs.197076	NR_003716	HOTAIR	Hox transcript antisense RNA (non-protein coding)	HOXAS/HOXC-AS4/HOXC11-AS1/NCRNA00072	LPH07360A
C06	Hs.445239	ENST00000425358	HOTAIRM1	HOXA transcript antisense RNA, myeloid-specific 1	HOXA-AS1/HOXA1-AS1/NCRNA00179	LPH10483A
C07	Hs.199486	ENST00000421733	HOTTIP	HOXA distal transcript antisense RNA	HOXA-AS6/HOXA13-AS1/NCRNA00213	LPH15377A
C08	Hs.587427	NR_002795	HOXA11-AS	HOXA11 antisense RNA 1 (non-protein coding)	HOXA-AS5/HOXA11-AS1/HOXA11AS/HOXA11S/NCRNA00076	LPH14348A
C09	Hs.721126	ENST00000517550	HOXA-AS2	HOXA cluster antisense RNA 2	HOXA3as	LPH18527A
C10	Hs.214343	ENST00000503668	HULC	Hepatocellular carcinoma up-regulated long non-coding RNA	HCCAT1/LINC00078/NCRNA00078	LPH17802A
C11	Hs.731866	NR_023915	IPW	Imprinted in Prader-Willi syndrome (non-protein coding)	NCRNA00002	LPH04422A
C12	N/A	KC469579	JADRR	JADE1 adjacent regulatory RNA	LINC00915/lncRNA-JADE	LPH28462A
D01	Hs.604823	NR_002728	KCNQ1OT1	KCNQ1 overlapping transcript 1 (non-protein coding)	KCNQ1-AS2/KCNQ10T1/Kncq1/KvDMR1/KvLQT1-AS/LIT1/NCRNA00012	LPH26385A
D02	N/A	ENST00000407852	KRASP1	Kirsten rat sarcoma viral oncogene homolog pseudogene 1 [Source:HGNC Symbol;Acc:6406]	KRASP1	LPH03770A
D03	Hs.652166	NR_024204	LINC00152	Non-protein coding RNA 152	C2orf59/NCRNA00152	LPH03823A
D04	Hs.9842	NR_001558	LINC00261	Long intergenic non-protein coding RNA 261	ALIEN/C20orf56/DEANR1/HCCDR1/NCRNA00261/onco-lncRNA-17	LPH22443A
D05	Hs.433151	NR_024065	LINC00312	Non-protein coding RNA 312	ERR-10/ERR10/LMCD1DN/LOH3CR2A/NAG-7/NAG7/NCRNA00312	LPH13268A
D06	Hs.742586	NR_046189	LINC00538	Long intergenic non-protein coding RNA 538	PROX1UT/Yiya	LPH00175A
D07	Hs.128066	NR_024480	LINC00887	Hypothetical LOC100131551	-	LPH02872A
D08	Hs.529860	ENST00000412141	LINC00963	Long intergenic non-protein coding RNA 963	-	LPH02180A
D09	Hs.550683	ENST00000594200	LINC01233	Long intergenic non-protein coding RNA 1233	XLOC_013014	LPH26258A
D10	Hs.211461	ENST00000510694	LINC01234	Long intergenic non-protein coding RNA 1234	LCAL84/onco-lncRNA-32	LPH16842A
D11	N/A	GU228577	LSINCT5	Long stress-induced non-coding transcript 5	-	LPH28463A
D12	Hs.745403	ENST00000511918	LUCAT1	Lung cancer associated transcript 1 (non-protein coding)	SCAL1	LPH16113A
E01	Hs.621695	NR_002819	MALAT1	Metastasis associated lung adenocarcinoma transcript 1 (non-protein coding)	HCN/LINC00047/NCRNA00047/NEAT2/PRO2853/mascRNA	LPH18065A
E02	Hs.654863	NR_002766	MEG3	Maternally expressed 3 (non-protein coding)	FP504/GTL2/LINC00023/NCRNA00023/PRO0518/PRO2160/onco-lncRNA-83/prebp1	LPH02974A
E03	Hs.697120	NR_001458	MIR155HG	MIR155 host gene (non-protein coding)	BIC/MIRHG2/NCRNA00172	LPH11424A
E04	Hs.24115	NR_027349	MIR17HG	MiR-17-92 cluster host gene (non-protein coding)	C13orf25/FGLDS2/LINC00048/MIHG1/MIRH1/MIRHG1/NCRNA00048/miR-17-92	LPH03205A
E05	Hs.458096	ENST00000304425	MIR31HG	MIR31 host gene (non-protein coding)	-	LPH01286A
E06	Hs.326728	NR_027148	MIR7-3HG	Non-protein coding RNA 306	C19orf30/Huh7/LINC00306/NCRNA00306/PGSF1/uc002mbe.2	LPH01377A
E07	Hs.677620	ENST00000419080	MRPL23-AS1	MRPL23 antisense RNA 1	-	LPH05940A
E08	Hs.745280	NR_102270	NAMA	Non-protein coding RNA, associated with MAP kinase pathway and growth arrest	-	LPH27069A
E09	Hs.373818	NR_003108	NBR2	Neighbor of BRCA1 gene 2 (non-protein coding)	NCRNA00192	LPH01939A
E10	Hs.523789	NR_028272	NEAT1	Nuclear paraspeckle assembly transcript 1 (non-protein coding)	LINC00084/NCRNA00084/TncRNA/VINC	LPH15809A
E11	Hs.742606	ENST00000517270	NRON	Non-protein coding RNA, repressor of NFAT	NCRNA00194	LPH18226A
E12	Hs.741557	NR_109836	PANDAR	Promoter of CDKN1A antisense DNA damage activated RNA	PANDA	LPH28464A
F01	Hs.663766	NR_015342	PCA3	Prostate cancer antigen 3 (non-protein coding)	DD3/NCRNA00019/PCAT3	LPH05631A
F02	Hs.571530	ENST00000519319	PCAT1	Prostate cancer associated transcript 1 (non-protein coding)	PCA1/PCAT-1	LPH18456A
F03	Hs.546994	NR_002769	PCGEM1	Prostate-specific transcript 1 (non-protein coding)	LINC00071/NCRNA00071/PCAT9	LPH06608A
F04	N/A	ENST00000445059	POU5F1P5	POU class 5 homeobox 1 pseudogene 5 [Source:HGNC Symbol;Acc:33311]	POU5F1P5	LPH12380A
F05	Hs.652970	ENST00000519282	PRNCR1	Prostate cancer associated non-coding RNA 1 [Source:HGNC Symbol;Acc:48942]	CARLo-3/PCAT8	LPH04839A
F06	Hs.658759	AK023948	PTCSC1	Papillary thyroid carcinoma susceptibility candidate 1 (non-protein coding)	NCRNA00197/PTCSC	LPH28466A
F07	Hs.742592	ENST00000556013	PTCSC3	Papillary thyroid carcinoma susceptibility candidate 3 (non-protein coding)	-	LPH21768A
F08	Hs.493716	NR_023917	PTENP1	Phosphatase and tensin homolog pseudogene 1	PTEN-rs/PTEN2/PTENpg1/PTH2/psiPTEN	LPH13461A
F09	Hs.133107	NR_003367	PVT1	Pvt1 oncogene (non-protein coding)	LINC00079/NCRNA00079/onco-lncRNA-100	LPH17013A
F10	Hs.587502	ENST00000363046	RMRP	RNA component of mitochondrial RNA processing endoribonuclease	CHH/NME1/RMRPR/RRP2	LPH26411A
F11	Hs.652568	NR_024037	RMST	Rhabdomyosarcoma 2 associated transcript (non-protein coding)	LINC00054/NCRMS/NCRNA00054	LPH20102A
F12	N/A	ENST00000455390	RPS6KA2-AS1	RPS6KA2 antisense RNA 1 [Source:HGNC Symbol;Acc:40511]	RPS6KA2-AS1	LPH09328A
G01	Hs.288215	NR_038108	SNHG16	Small nucleolar RNA host gene 16 (non-protein coding)	ncRAN	LPH01224A
G02	Hs.684549	AK024556	SPRY4-IT1	SPRY4 intronic transcript 1 (non-protein coding)	-	LPH28469A
G03	Hs.621179	NR_002190	SUMO1P3	SUMO1 pseudogene 3	-	LPH11559A
G04	Hs.436182	ENST00000363312	TERC	Telomerase RNA component	DKCA1/PFBMFT2/SCARNA19/TR/TRC3/hTR	LPH26581A
G05	Hs.195705	ENST00000431460	TRERNA1	Translation regulatory long non-coding RNA 1	LINC00651/treRNA	LPH09075A
G06	Hs.529901	NR_003255	TSIX	TSIX transcript, XIST antisense RNA (non-protein coding)	LINC00013/NCRNA00013/XIST-AS/XIST-AS1/XISTAS	LPH26832A
G07	Hs.554829	NR_002323	TUG1	Taurine upregulated 1 (non-protein coding)	LINC00080/NCRNA00080/TI-227H	LPH18394A
G08	Hs.120364	ENST00000466156	TUSC7	Tumor suppressor candidate 7 (non-protein coding)	LINC00902/LSAMP-AS1/LSAMP-AS3/LSAMPAS3/NCRNA00295	LPH15183A
G09	Hs.644234	NR_015379	UCA1	Urothelial cancer associated 1 (non-protein coding)	CUDR/LINC00178/NCRNA00178/UCAT1/onco-lncRNA-36	LPH02845A
G10	Hs.738474	NR_023920	WT1-AS	WT1 antisense RNA (non-protein coding)	WIT-1/WIT1/WT1-AS1/WT1AS	LPH01603A
G11	Hs.529901	NR_001564	XIST	X (inactive)-specific transcript (non-protein coding)	DXS1089/DXS399E/LINC00001/NCRNA00001/SXI1/swd66	LPH08103A
G12	Hs.356766	NR_003604	ZFAS1	ZNFX1 antisense RNA 1	C20orf199/HSUP1/HSUP2/NCRNA00275/ZNFX1-AS1	LPH01402A
H01	Hs.520640	NM_001101	ACTB	Actin, beta	BRWS1/PS1TP5BP1	LPH28471A
H02	Hs.534255	NM_004048	B2M	Beta-2-microglobulin	-	LPH28472A
H03	Hs.546285	NM_001002	RPLP0	Ribosomal protein, large, P0	L10E/LP0/P0/PRLP0/RPP0	LPH28473A
H04	N/A	NR_001445	RN7SK	RNA, 7SK small nuclear	7SK	LPH28399A
H05	N/A	NR_002907	SNORA73A	Small nucleolar RNA, H/ACA box 73A	E1/E1-7/E1b/RNE1/RNU17A/U17A	LPH28374A
H06	N/A	SA_00105	HGDC	Human Genomic DNA Contamination	HIGX1A
H07	N/A	SA_00104	RTC	Reverse Transcription Control	RTC
H08	N/A	SA_00104	RTC	Reverse Transcription Control	RTC
H09	N/A	SA_00104	RTC	Reverse Transcription Control	RTC
H10	N/A	SA_00103	PPC	Positive PCR Control	PPC
H11	N/A	SA_00103	PPC	Positive PCR Control	PPC
H12	N/A	SA_00103	PPC	Positive PCR Control	PPC
AVG(Avg), average; Ave, the average variance extracted; GOI, gene of interest; HKG, an average of reference genes; CI, confidence interval.

## Sheet: Average Ct
Position	Symbol	AVG Ct		Standard Deviation
		Control Group	Group 1	Control Group	Group 1
A01	ACTA2-AS1	39.56	35.38	0.769453	0.984093
A02	ADAMTS9-AS2	39.42	33.69	1.00567	3.46217
A03	AFAP1-AS1	40	35.33	0	4.16325
A04	AIRN	38.85	33.97	1.98949	2.55889
A05	BANCR	38.86	34.46	1.96744	1.00898
A06	BCAR4	38.32	34.22	1.45159	1.89469
A07	BLACAT1	39.6	33.86	0.696691	1.72556
A08	CAHM	36.74	33.14	2.83521	1.11565
A09	CBR3-AS1	37.14	33.86	1.54652	1.74669
A10	CCAT1	38.97	36.89	1.78378	2.14296
A11	CCAT2	38.01	35.76	1.81191	3.68074
A12	CDKN2B-AS1	34.75	33.77	1.44827	1.0316
B01	CRNDE	33.3	32.54	1.34681	0.423442
B02	DGCR5	38.93	34.3	0.929497	3.6178
B03	DLEU2	36.81	33.78	2.78561	1.16721
B04	DLX6-AS1	39.07	34.76	1.6172	1.94823
B05	EMX2OS	39.73	34.55	0.47403	3.59507
B06	FTX	37.34	35.72	1.54042	2.26157
B07	GACAT1	37.17	34.14	1.86949	1.70043
B08	GAS5	33.43	31.69	1.64725	0.29193
B09	GAS6-AS1	39.53	34.97	0.817974	4.43891
B10	GNAS-AS1	40	35.69	0	2.50913
B11	H19	34.93	32.22	1.51383	4.22171
B12	HAND2-AS1	38.23	35.36	2.02061	4.14612
C01	HEIH	37.27	33.29	1.42069	1.82036
C02	HIF1A-AS1	35.23	33.97	1.82271	1.44098
C03	HIF1A-AS2	35.89	35.98	2.19169	3.636
C04	HNF1A-AS1	37.84	33.77	1.32489	2.35598
C05	HOTAIR	35.72	32.84	1.5793	1.9843
C06	HOTAIRM1	37.12	35.53	0.275967	2.91072
C07	HOTTIP	39.15	34.76	1.47608	4.54736
C08	HOXA11-AS	39.43	34.87	0.544066	2.26592
C09	HOXA-AS2	39.25	36.1	0.853918	3.40458
C10	HULC	38.82	35.3	2.0405	3.58107
C11	IPW	34.88	33.17	2.3007	1.78653
C12	JADRR	38.82	35.73	1.03106	3.73778
D01	KCNQ1OT1	38.38	34.84	2.81288	4.64254
D02	KRASP1	37.41	35.33	1.23183	1.71535
D03	LINC00152	36.49	33.24	3.17583	1.69978
D04	LINC00261	36.65	34.49	0.48818	1.78847
D05	LINC00312	35.8	34.53	0.896489	2.38426
D06	LINC00538	38.05	34.53	2.82968	2.82426
D07	LINC00887	39.34	34.44	1.13454	2.45695
D08	LINC00963	39.31	34.68	1.19593	3.74423
D09	LINC01233	39.47	36.34	0.918016	3.20486
D10	LINC01234	37.97	35	1.7694	4.36468
D11	LSINCT5	40	35.02	0	1.79007
D12	LUCAT1	37.25	34.99	0.814738	3.74977
E01	MALAT1	37.55	35.24	2.71176	4.27301
E02	MEG3	38.54	33.48	1.41482	3.5729
E03	MIR155HG	37.54	36.38	0.779264	2.64283
E04	MIR17HG	35.81	34.59	1.59565	2.60229
E05	MIR31HG	36.32	33.23	2.13489	0.676979
E06	MIR7-3HG	39.23	33.56	1.34001	2.06383
E07	MRPL23-AS1	39.29	34.26	1.23838	2.23473
E08	NAMA	37.92	33.89	1.97623	1.98393
E09	NBR2	38.23	33.79	1.63293	3.05583
E10	NEAT1	35.99	31.56	3.65853	1.85054
E11	NRON	39.39	34.38	1.06515	1.8989
E12	PANDAR	39.49	35.61	0.889333	4.08732
F01	PCA3	34.18	33.7	1.96793	1.11267
F02	PCAT1	35.97	33.45	0.961655	0.999283
F03	PCGEM1	36.85	34.04	1.52389	1.2117
F04	POU5F1P5	38.02	34.35	1.85227	2.07322
F05	PRNCR1	37.84	34.36	1.87907	1.82637
F06	PTCSC1	39.45	35.07	0.950244	3.44082
F07	PTCSC3	35.21	34.47	4.11162	1.88047
F08	PTENP1	38.58	35.87	1.99492	3.22722
F09	PVT1	38.36	34.07	2.06119	2.42218
F10	RMRP	31.48	28.85	2.01811	0.72929
F11	RMST	35.2	33.91	1.99265	1.49252
F12	RPS6KA2-AS1	40	35.26	0	3.49585
G01	SNHG16	34.78	32.29	0.378427	1.31499
G02	SPRY4-IT1	35.21	32.71	0.993341	0.975077
G03	SUMO1P3	36.91	33.99	1.57379	1.80816
G04	TERC	36.9	32.12	2.6907	0.923611
G05	TRERNA1	37.6	33.15	2.6391	0.326869
G06	TSIX	38.2	36.31	0.327325	3.20398
G07	TUG1	36.52	33.49	1.19731	1.09463
G08	TUSC7	35.73	34.29	2.06813	2.24643
G09	UCA1	37.35	34.2	1.31724	2.3545
G10	WT1-AS	39.08	35.06	1.5958	3.34005
G11	XIST	35.56	34.67	2.91096	4.24845
G12	ZFAS1	32.18	31.1	2.37769	1.05206
H01	ACTB	30.61	28.54	1.77035	0.527542
H02	B2M	30.7	29.74	2.1378	0.649542
H03	RPLP0	29.74	29.09	2.42982	2.22339
H04	RN7SK	29.06	28.97	1.68563	1.22882
H05	SNORA73A	30.08	24.83	0.871959	0.93696
H06	HGDC	36.84	35.27	3.30212	3.60383
H07	RTC	24.8	25.77	0.190067	2.15863
H08	RTC	24.83	25.12	0.230062	0.943038
H09	RTC	24.87	25.79	0.188673	2.27559
H10	PPC	21.55	21.49	0.488149	0.290239
H11	PPC	21.59	21.38	0.499965	0.187464
H12	PPC	21.82	21.7	0.324509	0.347895

## Sheet: Average Delta(Ct)
Position	Symbol	AVG Delta(Ct) (Ct(GOI) - Ave Ct(HKG))		Standard Deviation
		Control Group	Group 1	Control Group	Group 1
A01	ACTA2-AS1	-0.444244	-4.61597	0.769453	0.984093
A02	ADAMTS9-AS2	-0.580622	-6.31493	1.00567	3.46217
A03	AFAP1-AS1	0	-4.66935	0	4.16325
A04	AIRN	-1.14863	-6.0283	1.98949	2.55889
A05	BANCR	-1.1359	-5.53754	1.96744	1.00898
A06	BCAR4	-1.67601	-5.78456	1.45159	1.89469
A07	BLACAT1	-0.402235	-6.14177	0.696691	1.72556
A08	CAHM	-3.26425	-6.85929	2.83521	1.11565
A09	CBR3-AS1	-2.86153	-6.14016	1.54652	1.74669
A10	CCAT1	-1.02987	-3.10936	1.78378	2.14296
A11	CCAT2	-1.99275	-4.23553	1.81191	3.68074
A12	CDKN2B-AS1	-5.25189	-6.23244	1.44827	1.0316
B01	CRNDE	-6.7015	-7.45706	1.34681	0.423442
B02	DGCR5	-1.07296	-5.69864	0.929497	3.6178
B03	DLEU2	-3.19427	-6.21794	2.78561	1.16721
B04	DLX6-AS1	-0.933692	-5.23588	1.6172	1.94823
B05	EMX2OS	-0.273681	-5.44566	0.47403	3.59507
B06	FTX	-2.66118	-4.27812	1.54042	2.26157
B07	GACAT1	-2.83197	-5.85542	1.86949	1.70043
B08	GAS5	-6.56975	-8.30867	1.64725	0.29193
B09	GAS6-AS1	-0.472258	-5.02809	0.817974	4.43891
B10	GNAS-AS1	0	-4.31331	0	2.50913
B11	H19	-5.07187	-7.78382	1.51383	4.22171
B12	HAND2-AS1	-1.76821	-4.63943	2.02061	4.14612
C01	HEIH	-2.73491	-6.70562	1.42069	1.82036
C02	HIF1A-AS1	-4.775	-6.02752	1.82271	1.44098
C03	HIF1A-AS2	-4.10705	-4.02043	2.19169	3.636
C04	HNF1A-AS1	-2.15603	-6.22712	1.32489	2.35598
C05	HOTAIR	-4.27815	-7.15833	1.5793	1.9843
C06	HOTAIRM1	-2.8766	-4.46539	0.275967	2.91072
C07	HOTTIP	-0.852217	-5.23603	1.47608	4.54736
C08	HOXA11-AS	-0.568857	-5.12554	0.544066	2.26592
C09	HOXA-AS2	-0.745521	-3.90051	0.853918	3.40458
C10	HULC	-1.17809	-4.69977	2.0405	3.58107
C11	IPW	-5.11677	-6.82991	2.3007	1.78653
C12	JADRR	-1.17933	-4.27351	1.03106	3.73778
D01	KCNQ1OT1	-1.62402	-5.15611	2.81288	4.64254
D02	KRASP1	-2.59039	-4.67349	1.23183	1.71535
D03	LINC00152	-3.50771	-6.76079	3.17583	1.69978
D04	LINC00261	-3.34811	-5.50567	0.48818	1.78847
D05	LINC00312	-4.20493	-5.47357	0.896489	2.38426
D06	LINC00538	-1.94988	-5.47016	2.82968	2.82426
D07	LINC00887	-0.655027	-5.56151	1.13454	2.45695
D08	LINC00963	-0.690471	-5.3208	1.19593	3.74423
D09	LINC01233	-0.530017	-3.66379	0.918016	3.20486
D10	LINC01234	-2.03368	-5.00073	1.7694	4.36468
D11	LSINCT5	0	-4.97776	0	1.79007
D12	LUCAT1	-2.75294	-5.00966	0.814738	3.74977
E01	MALAT1	-2.45087	-4.75706	2.71176	4.27301
E02	MEG3	-1.46423	-6.52347	1.41482	3.5729
E03	MIR155HG	-2.46336	-3.61775	0.779264	2.64283
E04	MIR17HG	-4.19357	-5.40823	1.59565	2.60229
E05	MIR31HG	-3.6849	-6.76932	2.13489	0.676979
E06	MIR7-3HG	-0.773658	-6.44268	1.34001	2.06383
E07	MRPL23-AS1	-0.714976	-5.73766	1.23838	2.23473
E08	NAMA	-2.0846	-6.11288	1.97623	1.98393
E09	NBR2	-1.76689	-6.21193	1.63293	3.05583
E10	NEAT1	-4.0072	-8.43719	3.65853	1.85054
E11	NRON	-0.614965	-5.61898	1.06515	1.8989
E12	PANDAR	-0.513457	-4.38777	0.889333	4.08732
F01	PCA3	-5.81666	-6.30284	1.96793	1.11267
F02	PCAT1	-4.0313	-6.54954	0.961655	0.999283
F03	PCGEM1	-3.14905	-5.96324	1.52389	1.2117
F04	POU5F1P5	-1.98166	-5.64594	1.85227	2.07322
F05	PRNCR1	-2.15921	-5.64006	1.87907	1.82637
F06	PTCSC1	-0.548624	-4.92767	0.950244	3.44082
F07	PTCSC3	-4.78813	-5.53035	4.11162	1.88047
F08	PTENP1	-1.41725	-4.1315	1.99492	3.22722
F09	PVT1	-1.64432	-5.93222	2.06119	2.42218
F10	RMRP	-8.51965	-11.1512	2.01811	0.72929
F11	RMST	-4.79814	-6.0893	1.99265	1.49252
F12	RPS6KA2-AS1	0	-4.73948	0	3.49585
G01	SNHG16	-5.22251	-7.71269	0.378427	1.31499
G02	SPRY4-IT1	-4.79301	-7.29067	0.993341	0.975077
G03	SUMO1P3	-3.088	-6.00593	1.57379	1.80816
G04	TERC	-3.09549	-7.88004	2.6907	0.923611
G05	TRERNA1	-2.39741	-6.84867	2.6391	0.326869
G06	TSIX	-1.80194	-3.68649	0.327325	3.20398
G07	TUG1	-3.47781	-6.51461	1.19731	1.09463
G08	TUSC7	-4.27116	-5.71422	2.06813	2.24643
G09	UCA1	-2.64956	-5.79597	1.31724	2.3545
G10	WT1-AS	-0.921333	-4.93572	1.5958	3.34005
G11	XIST	-4.44306	-5.33346	2.91096	4.24845
G12	ZFAS1	-7.82454	-8.89812	2.37769	1.05206
H01	ACTB	-9.3949	-11.4609	1.77035	0.527542
H02	B2M	-9.29517	-10.26	2.1378	0.649542
H03	RPLP0	-10.2612	-10.9143	2.42982	2.22339
H04	RN7SK	-10.9355	-11.0309	1.68563	1.22882
H05	SNORA73A	-9.92345	-15.1675	0.871959	0.93696
H06	HGDC	-3.15979	-4.72514	3.30212	3.60383
H07	RTC	-15.1958	-14.2307	0.190067	2.15863
H08	RTC	-15.167	-14.8847	0.230062	0.943038
H09	RTC	-15.1311	-14.2116	0.188673	2.27559
H10	PPC	-18.4518	-18.5106	0.488149	0.290239
H11	PPC	-18.4063	-18.62	0.499965	0.187464
H12	PPC	-18.182	-18.3032	0.324509	0.347895

## Sheet: 2^(-Avg.(Delta(Ct))
Position	Symbol	2^(-Avg.(Delta(Ct))
		Control Group	Group 1
A01	ACTA2-AS1	1.3606	24.5214
A02	ADAMTS9-AS2	1.49549	79.6128
A03	AFAP1-AS1	1	25.4457
A04	AIRN	2.21704	65.268
A05	BANCR	2.19756	46.448
A06	BCAR4	3.19543	55.1223
A07	BLACAT1	1.32155	70.6084
A08	CAHM	9.60806	116.105
A09	CBR3-AS1	7.26788	70.5295
A10	CCAT1	2.04184	8.63002
A11	CCAT2	3.97995	18.8374
A12	CDKN2B-AS1	38.1044	75.1883
B01	CRNDE	104.077	175.711
B02	DGCR5	2.10375	51.9351
B03	DLEU2	9.15314	74.4367
B04	DLX6-AS1	1.91016	37.6839
B05	EMX2OS	1.20889	43.5819
B06	FTX	6.3255	19.4018
B07	GACAT1	7.12046	57.8971
B08	GAS5	94.993	317.072
B09	GAS6-AS1	1.38728	32.6291
B10	GNAS-AS1	1	19.8809
B11	H19	33.6345	220.375
B12	HAND2-AS1	3.40631	24.9234
C01	HEIH	6.65718	104.374
C02	HIF1A-AS1	27.379	65.2326
C03	HIF1A-AS2	17.2323	16.2282
C04	HNF1A-AS1	4.45687	74.9115
C05	HOTAIR	19.4022	142.847
C06	HOTAIRM1	7.34417	22.0911
C07	HOTTIP	1.80527	37.688
C08	HOXA11-AS	1.48335	34.9093
C09	HOXA-AS2	1.67658	14.9338
C10	HULC	2.26276	25.9878
C11	IPW	34.6978	113.765
C12	JADRR	2.26471	19.34
D01	KCNQ1OT1	3.08232	35.657
D02	KRASP1	6.02263	25.5189
D03	LINC00152	11.3743	108.442
D04	LINC00261	10.1831	45.433
D05	LINC00312	18.4422	44.4333
D06	LINC00538	3.86342	44.3285
D07	LINC00887	1.57465	47.2259
D08	LINC00963	1.61381	39.9686
D09	LINC01233	1.44395	12.6739
D10	LINC01234	4.09449	32.0162
D11	LSINCT5	1	31.5105
D12	LUCAT1	6.74092	32.215
E01	MALAT1	5.46747	27.0406
E02	MEG3	2.75916	91.9939
E03	MIR155HG	5.515	12.2759
E04	MIR17HG	18.2975	42.4658
E05	MIR31HG	12.8607	109.086
E06	MIR7-3HG	1.7096	86.9844
E07	MRPL23-AS1	1.64146	53.359
E08	NAMA	4.24158	69.2088
E09	NBR2	3.4032	74.1273
E10	NEAT1	16.08	346.616
E11	NRON	1.53152	49.1453
E12	PANDAR	1.42747	20.9339
F01	PCA3	56.3624	78.9483
F02	PCAT1	16.3509	93.6718
F03	PCGEM1	8.87068	62.39
F04	POU5F1P5	3.94946	50.0723
F05	PRNCR1	4.46669	49.8688
F06	PTCSC1	1.46269	30.4351
F07	PTCSC3	27.6293	46.217
F08	PTENP1	2.67077	17.5269
F09	PVT1	3.12601	61.0626
F10	RMRP	367.002	2274.25
F11	RMST	27.8217	68.0865
F12	RPS6KA2-AS1	1	26.7131
G01	SNHG16	37.3363	209.773
G02	SPRY4-IT1	27.723	156.571
G03	SUMO1P3	8.50319	64.2636
G04	TERC	8.5474	235.574
G05	TRERNA1	5.26855	115.254
G06	TSIX	3.48687	12.8749
G07	TUG1	11.141	91.4311
G08	TUSC7	19.3085	52.499
G09	UCA1	6.27475	55.5599
G10	WT1-AS	1.89386	30.6056
G11	XIST	21.7517	40.3211
G12	ZFAS1	226.684	477.092
H01	ACTB	673.202	2818.84
H02	B2M	628.237	1226.19
H03	RPLP0	1227.23	1929.87
H04	RN7SK	1958.39	2092.31
H05	SNORA73A	971.081	36802.8
H06	HGDC	8.93703	26.449
H07	RTC	37530.9	19225.5
H08	RTC	36790.6	30250.3
H09	RTC	35885.2	18972.2
H10	PPC	358538	373464
H11	PPC	347422	402890
H12	PPC	297384	323460

## Sheet: Fold Change
Position	Symbol	Fold Change (comparing to control group)
		Group 1
		Fold Change	95% CI	Comments
A01	ACTA2-AS1	18.0225	( 0.36, 35.68 )	B
A02	ADAMTS9-AS2	53.2351	( 0.00001, 203.78 )	B
A03	AFAP1-AS1	25.4457	( 0.00001, 108.54 )	B
A04	AIRN	29.4393	( 0.00001, 104.29 )	B
A05	BANCR	21.1362	( 0.00001, 57.79 )
A06	BCAR4	17.2503	( 0.00001, 49.55 )	B
A07	BLACAT1	53.4284	( 0.00001, 131.41 )	B
A08	CAHM	12.0841	( 0.00001, 40.96 )	B
A09	CBR3-AS1	9.7043	( 0.00001, 27.46 )	B
A10	CCAT1	4.2266	( 0.00001, 13.47 )	B
A11	CCAT2	4.7331	( 0.00001, 19.96 )	B
A12	CDKN2B-AS1	1.9732	( 0.00001, 4.73 )	B
B01	CRNDE	1.6883	( 0.00001, 3.56 )	B
B02	DGCR5	24.6869	( 0.00001, 97.02 )	B
B03	DLEU2	8.1324	( 0.00001, 27.40 )	B
B04	DLX6-AS1	19.7282	( 0.00001, 58.91 )	B
B05	EMX2OS	36.0512	( 0.00001, 138.59 )	B
B06	FTX	3.0672	( 0.00001, 9.65 )	B
B07	GACAT1	8.1311	( 0.00001, 24.25 )	B
B08	GAS5	3.3378	( 0.00001, 7.72 )	B
B09	GAS6-AS1	23.5202	( 0.00001, 106.79 )	B
B10	GNAS-AS1	19.8809	( 0.00001, 59.01 )	B
B11	H19	6.5521	( 0.00001, 29.60 )	B
B12	HAND2-AS1	7.3168	( 0.00001, 33.79 )	B
C01	HEIH	15.6784	( 0.00001, 44.08 )	B
C02	HIF1A-AS1	2.3826	( 0.00001, 6.72 )	B
C03	HIF1A-AS2	0.9417	( 0.00001, 4.08 )	B
C04	HNF1A-AS1	16.8081	( 0.00001, 52.44 )	B
C05	HOTAIR	7.3624	( 0.00001, 22.01 )	B
C06	HOTAIRM1	3.008	( 0.00001, 9.91 )	B
C07	HOTTIP	20.8766	( 0.00001, 99.16 )	B
C08	HOXA11-AS	23.5341	( 0.00001, 66.55 )	B
C09	HOXA-AS2	8.9073	( 0.00001, 33.43 )	B
C10	HULC	11.485	( 0.00001, 48.61 )	B
C11	IPW	3.2787	( 0.00001, 10.77 )	B
C12	JADRR	8.5397	( 0.00001, 34.51 )	B
D01	KCNQ1OT1	11.5683	( 0.00001, 60.82 )	B
D02	KRASP1	4.2372	( 0.00001, 11.26 )	B
D03	LINC00152	9.534	( 0.00001, 36.47 )	B
D04	LINC00261	4.4616	( 0.00001, 10.95 )	B
D05	LINC00312	2.4093	( 0.00001, 7.22 )	B
D06	LINC00538	11.4739	( 0.00001, 47.45 )	B
D07	LINC00887	29.9914	( 0.00001, 93.65 )	B
D08	LINC00963	24.7666	( 0.00001, 101.12 )	B
D09	LINC01233	8.7773	( 0.00001, 31.73 )	B
D10	LINC01234	7.8193	( 0.00001, 36.71 )	B
D11	LSINCT5	31.5105	( 0.00001, 75.75 )	B
D12	LUCAT1	4.779	( 0.00001, 19.16 )	B
E01	MALAT1	4.9457	( 0.00001, 24.58 )	B
E02	MEG3	33.3413	( 0.00001, 133.84 )	B
E03	MIR155HG	2.2259	( 0.00001, 7.04 )	B
E04	MIR17HG	2.3209	( 0.00001, 7.88 )	B
E05	MIR31HG	8.4821	( 0.00001, 23.38 )	B
E06	MIR7-3HG	50.88	( 0.00001, 149.08 )	B
E07	MRPL23-AS1	32.5071	( 0.00001, 97.65 )	B
E08	NAMA	16.3168	( 0.00001, 52.16 )	B
E09	NBR2	21.7817	( 0.00001, 80.98 )	B
E10	NEAT1	21.5557	( 0.00001, 90.88 )	B
E11	NRON	32.0892	( 0.00001, 86.89 )	B
E12	PANDAR	14.6651	( 0.00001, 62.78 )	B
F01	PCA3	1.4007	( 0.00001, 3.88 )	B
F02	PCAT1	5.7288	( 0.00001, 11.96 )	B
F03	PCGEM1	7.0333	( 0.00001, 17.77 )	B
F04	POU5F1P5	12.6783	( 0.00001, 40.33 )	B
F05	PRNCR1	11.1646	( 0.00001, 34.11 )	B
F06	PTCSC1	20.8077	( 0.00001, 79.07 )	B
F07	PTCSC3	1.6728	( 0.00001, 7.60 )	B
F08	PTENP1	6.5625	( 0.00001, 26.09 )	B
F09	PVT1	19.5337	( 0.00001, 68.26 )	B
F10	RMRP	6.1968	( 0.00001, 16.63 )	A
F11	RMST	2.4472	( 0.00001, 7.23 )	B
F12	RPS6KA2-AS1	26.7131	( 0.00001, 99.96 )	B
G01	SNHG16	5.6185	( 0.00001, 11.65 )	B
G02	SPRY4-IT1	5.6477	( 0.00001, 11.81 )	B
G03	SUMO1P3	7.5576	( 0.00001, 21.77 )	B
G04	TERC	27.5609	( 0.00001, 89.06 )	B
G05	TRERNA1	21.8758	( 0.00001, 67.51 )
G06	TSIX	3.6924	( 0.00001, 13.02 )	B
G07	TUG1	8.2067	( 0.00001, 18.65 )	B
G08	TUSC7	2.719	( 0.00001, 9.23 )	B
G09	UCA1	8.8545	( 0.00001, 27.59 )	B
G10	WT1-AS	16.1604	( 0.00001, 63.08 )	B
G11	XIST	1.8537	( 0.00001, 9.34 )	B
G12	ZFAS1	2.1047	( 0.00001, 6.40 )	B
H01	ACTB	4.1872	( 0.00001, 10.25 )	A
H02	B2M	1.9518	( 0.00001, 5.37 )	A
H03	RPLP0	1.5725	( 0.00001, 5.63 )
H04	RN7SK	1.0684	( 0.00001, 2.82 )
H05	SNORA73A	37.8988	( 0.00001, 75.95 )	A
H06	HGDC	2.9595	( 0.00001, 14.31 )	B
H07	RTC	0.5123	( 0.00001, 1.38 )
H08	RTC	0.8222	( 0.20, 1.45 )
H09	RTC	0.5287	( 0.00001, 1.48 )
H10	PPC	1.0416	( 0.58, 1.51 )
H11	PPC	1.1597	( 0.67, 1.65 )
H12	PPC	1.0877	( 0.68, 1.49 )
Comments:
A: This gene's average threshold cycle is relatively high (> 30) in either the control or the test sample, and is reasonably low in the other sample (< 30).
These data mean that the gene's expression is relatively low in one sample and reasonably detected in the other sample suggesting that the actual fold-change value is at least as large as the calculated and reported fold-change result.
This fold-change result may also have greater variations if p value > 0.05; therefore, it is important to have a sufficient number of biological replicates to validate the result for this gene.
B: This gene's average threshold cycle is relatively high (> 30), meaning that its relative expression level is low, in both control and test samples, and the p-value for the fold-change is either unavailable or relatively high (p > 0.05).
This fold-change result may also have greater variations; therefore, it is important to have a sufficient number of biological replicates to validate the result for this gene.
C: This gene's average threshold cycle is either not determined or greater than the defined cut-off (deault 35), in both samples meaning that its expression was undetected, making this fold-change result erroneous and un-interpretable.
Fold Change & Fold Regulation:
Fold-Change (2^(- Delta Delta CT)) is the normalized gene expression (2^(- Delta CT)) in the Test Sample divided the normalized gene expression (2^(- Delta CT)) in the Control Sample.
Fold-Regulation represents fold-change results in a biologically meaningful way. Fold-change values greater than one indicate a positive- or an up-regulation, and the fold-regulation is equal to the fold-change.
Fold-change values less than one indicate a negative or down-regulation, and the fold-regulation is the negative inverse of the fold-change.
Fold-change and fold-regulation values greater than 2 are indicated in red; fold-change values less than 0.5 and fold-regulation values less than -2 are indicated in blue.
p-value:
The p values are calculated based on a Student's t-test of the replicate 2^(- Delta CT) values for each gene in the control group and treatment groups, and p values less than 0.05 are indicated in red.

## Sheet: p-value
Position	Symbol	p-value (comparing to control group)
		Group 1
A01	ACTA2-AS1	0.086031
A02	ADAMTS9-AS2	0.318406
A03	AFAP1-AS1	0.237593
A04	AIRN	0.198922
A05	BANCR	0.045341
A06	BCAR4	0.179955
A07	BLACAT1	0.190136
A08	CAHM	0.143641
A09	CBR3-AS1	0.22874
A10	CCAT1	0.273618
A11	CCAT2	0.164741
A12	CDKN2B-AS1	0.347574
B01	CRNDE	0.515192
B02	DGCR5	0.286891
B03	DLEU2	0.192557
B04	DLX6-AS1	0.094022
B05	EMX2OS	0.252808
B06	FTX	0.19145
B07	GACAT1	0.180837
B08	GAS5	0.104924
B09	GAS6-AS1	0.218554
B10	GNAS-AS1	0.131346
B11	H19	0.151213
B12	HAND2-AS1	0.264586
C01	HEIH	0.211089
C02	HIF1A-AS1	0.461466
C03	HIF1A-AS2	0.695192
C04	HNF1A-AS1	0.269482
C05	HOTAIR	0.253073
C06	HOTAIRM1	0.188492
C07	HOTTIP	0.234559
C08	HOXA11-AS	0.18269
C09	HOXA-AS2	0.155997
C10	HULC	0.137164
C11	IPW	0.391054
C12	JADRR	0.171909
D01	KCNQ1OT1	0.295956
D02	KRASP1	0.138852
D03	LINC00152	0.255536
D04	LINC00261	0.159389
D05	LINC00312	0.283586
D06	LINC00538	0.161599
D07	LINC00887	0.243698
D08	LINC00963	0.28335
D09	LINC01233	0.159953
D10	LINC01234	0.33182
D11	LSINCT5	0.184291
D12	LUCAT1	0.255067
E01	MALAT1	0.313174
E02	MEG3	0.324671
E03	MIR155HG	0.275247
E04	MIR17HG	0.261349
E05	MIR31HG	0.069961
E06	MIR7-3HG	0.257564
E07	MRPL23-AS1	0.136081
E08	NAMA	0.254815
E09	NBR2	0.281576
E10	NEAT1	0.252959
E11	NRON	0.187274
E12	PANDAR	0.304081
F01	PCA3	0.905219
F02	PCAT1	0.069717
F03	PCGEM1	0.156356
F04	POU5F1P5	0.199809
F05	PRNCR1	0.133164
F06	PTCSC1	0.250353
F07	PTCSC3	0.524934
F08	PTENP1	0.149453
F09	PVT1	0.281258
F10	RMRP	0.13139
F11	RMST	0.529094
F12	RPS6KA2-AS1	0.33478
G01	SNHG16	0.146287
G02	SPRY4-IT1	0.089564
G03	SUMO1P3	0.133257
G04	TERC	0.069048
G05	TRERNA1	0.005813
G06	TSIX	0.156379
G07	TUG1	0.093073
G08	TUSC7	0.389567
G09	UCA1	0.197777
G10	WT1-AS	0.28862
G11	XIST	0.475264
G12	ZFAS1	0.620566
H01	ACTB	0.056933
H02	B2M	0.863026
H03	RPLP0	0.734836
H04	RN7SK	0.845956
H05	SNORA73A	0.068494
H06	HGDC	0.488905
H07	RTC	0.695818
H08	RTC	0.793213
H09	RTC	0.824677
H10	PPC	0.935712
H11	PPC	0.602135
H12	PPC	0.673811
p-value:
The p values are calculated based on a Student's t-test of the replicate 2^(- Delta CT) values for each gene in the control group and treatment groups, and p values less than 0.05 are indicated in red.

## Sheet: Fold Regulation
Position	Symbol	Up-Down Regulation (comparing to control group)
		Group 1
		Fold Regulation	Comments
A01	ACTA2-AS1	18.0225	B
A02	ADAMTS9-AS2	53.2351	B
A03	AFAP1-AS1	25.4457	B
A04	AIRN	29.4393	B
A05	BANCR	21.1362
A06	BCAR4	17.2503	B
A07	BLACAT1	53.4284	B
A08	CAHM	12.0841	B
A09	CBR3-AS1	9.7043	B
A10	CCAT1	4.2266	B
A11	CCAT2	4.7331	B
A12	CDKN2B-AS1	1.9732	B
B01	CRNDE	1.6883	B
B02	DGCR5	24.6869	B
B03	DLEU2	8.1324	B
B04	DLX6-AS1	19.7282	B
B05	EMX2OS	36.0512	B
B06	FTX	3.0672	B
B07	GACAT1	8.1311	B
B08	GAS5	3.3378	B
B09	GAS6-AS1	23.5202	B
B10	GNAS-AS1	19.8809	B
B11	H19	6.5521	B
B12	HAND2-AS1	7.3168	B
C01	HEIH	15.6784	B
C02	HIF1A-AS1	2.3826	B
C03	HIF1A-AS2	-1.0619	B
C04	HNF1A-AS1	16.8081	B
C05	HOTAIR	7.3624	B
C06	HOTAIRM1	3.008	B
C07	HOTTIP	20.8766	B
C08	HOXA11-AS	23.5341	B
C09	HOXA-AS2	8.9073	B
C10	HULC	11.485	B
C11	IPW	3.2787	B
C12	JADRR	8.5397	B
D01	KCNQ1OT1	11.5683	B
D02	KRASP1	4.2372	B
D03	LINC00152	9.534	B
D04	LINC00261	4.4616	B
D05	LINC00312	2.4093	B
D06	LINC00538	11.4739	B
D07	LINC00887	29.9914	B
D08	LINC00963	24.7666	B
D09	LINC01233	8.7773	B
D10	LINC01234	7.8193	B
D11	LSINCT5	31.5105	B
D12	LUCAT1	4.779	B
E01	MALAT1	4.9457	B
E02	MEG3	33.3413	B
E03	MIR155HG	2.2259	B
E04	MIR17HG	2.3209	B
E05	MIR31HG	8.4821	B
E06	MIR7-3HG	50.88	B
E07	MRPL23-AS1	32.5071	B
E08	NAMA	16.3168	B
E09	NBR2	21.7817	B
E10	NEAT1	21.5557	B
E11	NRON	32.0892	B
E12	PANDAR	14.6651	B
F01	PCA3	1.4007	B
F02	PCAT1	5.7288	B
F03	PCGEM1	7.0333	B
F04	POU5F1P5	12.6783	B
F05	PRNCR1	11.1646	B
F06	PTCSC1	20.8077	B
F07	PTCSC3	1.6728	B
F08	PTENP1	6.5625	B
F09	PVT1	19.5337	B
F10	RMRP	6.1968	A
F11	RMST	2.4472	B
F12	RPS6KA2-AS1	26.7131	B
G01	SNHG16	5.6185	B
G02	SPRY4-IT1	5.6477	B
G03	SUMO1P3	7.5576	B
G04	TERC	27.5609	B
G05	TRERNA1	21.8758
G06	TSIX	3.6924	B
G07	TUG1	8.2067	B
G08	TUSC7	2.719	B
G09	UCA1	8.8545	B
G10	WT1-AS	16.1604	B
G11	XIST	1.8537	B
G12	ZFAS1	2.1047	B
H01	ACTB	4.1872	A
H02	B2M	1.9518	A
H03	RPLP0	1.5725
H04	RN7SK	1.0684
H05	SNORA73A	37.8988	A
H06	HGDC	2.9595	B
H07	RTC	-1.9521
H08	RTC	-1.2162
H09	RTC	-1.8915
H10	PPC	1.0416
H11	PPC	1.1597
H12	PPC	1.0877
Comments:
A: This gene's average threshold cycle is relatively high (> 30) in either the control or the test sample, and is reasonably low in the other sample (< 30).
These data mean that the gene's expression is relatively low in one sample and reasonably detected in the other sample suggesting that the actual fold-change value is at least as large as the calculated and reported fold-change result.
This fold-change result may also have greater variations if p value > 0.05; therefore, it is important to have a sufficient number of biological replicates to validate the result for this gene.
B: This gene's average threshold cycle is relatively high (> 30), meaning that its relative expression level is low, in both control and test samples, and the p-value for the fold-change is either unavailable or relatively high (p > 0.05).
This fold-change result may also have greater variations; therefore, it is important to have a sufficient number of biological replicates to validate the result for this gene.
C: This gene's average threshold cycle is either not determined or greater than the defined cut-off (deault 35), in both samples meaning that its expression was undetected, making this fold-change result erroneous and un-interpretable.
Fold Change & Fold Regulation:
Fold-Change (2^(- Delta Delta CT)) is the normalized gene expression (2^(- Delta CT)) in the Test Sample divided the normalized gene expression (2^(- Delta CT)) in the Control Sample.
Fold-Regulation represents fold-change results in a biologically meaningful way. Fold-change values greater than one indicate a positive- or an up-regulation, and the fold-regulation is equal to the fold-change.
Fold-change values less than one indicate a negative or down-regulation, and the fold-regulation is the negative inverse of the fold-change.
Fold-change and fold-regulation values greater than 2 are indicated in red; fold-change values less than 0.5 and fold-regulation values less than -2 are indicated in blue.
p-value:
The p values are calculated based on a Student's t-test of the replicate 2^(- Delta CT) values for each gene in the control group and treatment groups, and p values less than 0.05 are indicated in red.
